1 **Characterization of mannitol metabolism genes in *Saccharina***  
2 **explains its key role in mannitol biosynthesis and evolutionary**  
3 **significance in Laminariales**

4

5 **Shan Chi<sup>1,2</sup>, Tao Liu<sup>1\*</sup>, Cui Liu<sup>2</sup>, Yuemei Jin<sup>1</sup>, Hongxin Yin<sup>1</sup>, Xin Xu<sup>1</sup>, Yue Li<sup>1</sup>**

6 <sup>1</sup> Ocean University of China, Qingdao, P. R. China,

7 <sup>2</sup> Qingdao Haida BlueTek Biotechnology Co., Ltd, Qingdao, P. R. China.

8

9 **\*Corresponding author: [liutao@ouc.edu.cn](mailto:liutao@ouc.edu.cn) (Tao Liu)**

10

11

12

13

14

15

16

17

18

19

20

21

22

23

24

25

26

27

28

## 29 Abstract

30 As a unique photosynthetic product in brown algae, mannitol exhibits high synthesis and  
 31 accumulation in *Saccharina japonica*. Mannitol acts as a carbon-storage compound and is an  
 32 osmoprotectant, imparting increased tolerance to osmotic stress. However, the underlying  
 33 biochemical and molecular mechanisms in macroalgae have not been studied. Analysis of  
 34 genomic and transcriptomic data has shown that mannitol metabolism in *S. japonica* is a circular  
 35 pathway composed of four steps. In this study, one *S. japonica* mannitol-1-phosphate  
 36 dehydrogenase (M1PDH2) and two mannitol-1-phosphatase (M1Pase) proteins were  
 37 recombinantly expressed to analysis enzyme biochemical properties. RNA sequencing and droplet  
 38 digital polymerase chain reaction were used to analyze the gene expression patterns of mannitol  
 39 metabolism in different generations, tissues, sexes, and abiotic stresses. Our findings revealed  
 40 insights into the mannitol synthesis pathways in brown algae. All genes were constitutively  
 41 expressed in all samples, allowing maintenance of basic mannitol anabolism and dynamic  
 42 maintenance of the "saccharide pool" *in vivo* as the main storage and antistress mechanism.  
 43 Enzyme assays confirmed that the recombinant proteins produced mannitol, with the specific  
 44 activity of SjaM1Pase1 being 1.8–4831 times that of other algal enzymes. Combined with the  
 45 transcriptional analysis, SjaM1Pase1 was shown to be the dominant gene of mannitol metabolism.  
 46 Mannitol metabolism genes in multicellular filamentous (gametophyte) and large parenchyma  
 47 thallus (sporophyte) generations had different expression levels and responded differently under  
 48 environmental stresses (hyposaline and hyperthermia) in gametophytes and sporophytes. The  
 49 considerable variation in enzyme characteristics and expression of mannitol synthesis genes  
 50 suggest their important ecophysiological significance in the evolution of complex systems  
 51 (filamentous and thallus) and environmental adaptation of Laminariales.

52

53 **Key words:** Mannitol metabolism, *Saccharina japonica*, Laminariales, Enzyme activity  
 54 verification, RNA-sequencing, Droplet digital PCR

55

56

57

## Introduction

Mannitol is one of the most widely occurring sugar alcohols in nature and is produced by a variety of living organisms, including bacteria, fungi, terrestrial plants, and algae (Iwamoto and Shiraiwa, 2005; Rousvoal *et al.*, 2011). The presence of mannitol has been reported in primary endosymbiotic algae, such as those belonging to Chlorophyta (Dickson and Kirst, 1987; Dittami *et al.*, 2011) and a few species of Rhodophyta (Karsten *et al.*, 1997; Eggert *et al.*, 2006), as well as in secondary endosymbiotic Ochrophyta algae, such as brown algae (Ji *et al.*, 1980; Karsten *et al.*, 1991; Gylle *et al.*, 2009) and diatoms (Hellebust, 1965). As one of the main primary photosynthetic products and storage compounds in Laminariales (Kremer, 1980; Wei *et al.*, 2013; Xia *et al.*, 2016), mannitol can represent up to 15–26% of the dry weight of the organism (Black, 1948; Reed *et al.*, 1985). Moreover, mannitol fulfills key physiological roles, including protection against environmental stress, and can act as an organic osmolyte, compatible solute, antioxidant, or thermal protectant (Iwamoto and Shiraiwa, 2005; Patel and Williamson, 2016; Tonon *et al.*, 2017). Despite the importance of mannitol in the physiology of brown algae, information on its biosynthetic pathway is scarce; the functions of only a few pathway genes have been confirmed, and regulatory mechanisms are poorly understood, warranting further studies.

*Saccharina* is one of the most important macro-brown algae in the order Laminariales because of its considerably high biomass, dominance, and economic significance (Bartsch *et al.*, 2008). Asian countries have been cultivating *Saccharina* species since the early 1950s (Tseng, 1987), and presently, the annual production (7.7 million tons) of this species is the second highest among all aquaculture species (FAO, 2016). Recently, compounds such as mannitol derived from *Saccharina* have been widely used in health food, medicine, analytical chemistry, and scientific research (Belcher and Nutten, 1960; Saha and Racing, 2011; Varzakas *et al.*, 2012; Wakai *et al.*, 2013). The life history of *Saccharina* comprises several stages, which include single-cell (meiospore), multicellular filamentous (gametophyte, n), and large parenchyma individual (sporophyte, 2n) stages (Bartsch *et al.*, 2008). Its unique heteromorphic alternation of generations makes it quite different from its close relatives in the genus *Ectocarpus*, which lack the parenchyma stage (Cock *et al.*, 2014). Although brown algae are the only secondary endosymbiotic taxa with sophisticated multicellularity (Knoll, 2011; Niklas and Newman, 2013;

87 Cock *et al.*, 2014), the underlying regulatory mechanisms responsible for the structural difference  
88 between filamentous brown algae (*Ectocarpus*) and heteromorphic haploid-diploid algae  
89 (*Saccharina*) are not well understood. Moreover, Laminariales, like *S. japonica*, are dominantly  
90 present in marine ecosystems of cold, temperate, and tropical coastal zones with harsh extremes  
91 (Liu and Pang, 2015). Therefore, their major photosynthetic carbohydrates, such as mannitol, may  
92 need to evolve distinctive adaptation or acclimation mechanisms.

93 Recently, the availability of the *Ectocarpus siliculosus* genome has paved the way for  
94 studying the molecular basis of mannitol biosynthesis in algae (Cock *et al.*, 2010). The  
95 biosynthesis involves two enzymatic steps; the first step is the reduction of fructose-6-phosphate  
96 (F6P) to mannitol-1-phosphate (M1P) by mannitol-1-P dehydrogenase (M1PDH; EC 1.1.1.17),  
97 and the second step is the hydrolysis of the phosphoric ester of M1P to produce mannitol by  
98 mannitol-1-phosphatase (M1Pase; EC 3.1.3.22) (Iwamoto and Shiraiwa, 2005). Recent analysis of  
99 the distribution of mannitol biosynthesis genes in algae revealed the presence of *M1PDH* and  
100 *M1Pase* genes in these species (Tonon, 2017). There are one *M1PDH* gene, two *M1Pase* genes,  
101 and one bifunctional *M1PDH/M1Pase* fusion gene (Liberator *et al.*, 1998; Groisillier *et al.*, 2014);  
102 the members of Phaeophyceae, including Ectocarpales and Laminariales, possess *M1PDH* and the  
103 haloacid dehalogenases (*HAD-M1Pase*). Previous phylogenetic analyses have suggested that these  
104 genes were imported into brown algae by horizontal gene transfer from *Actinobacteria* (Michel *et al.*  
105 *et al.*, 2010). Later, a more comprehensive assessment across various algal lineages proved that this  
106 gene may have been present in nonphotosynthetic eukaryotic host cells involved in endosymbiosis  
107 (Tonon, 2017). Native M1PDH and M1Pase activity has previously been characterized in cell-free  
108 extracts from red algae, namely *Dixoniella grisea* (Eggert *et al.*, 2006), *Caloglossa continua*  
109 (Iwamoto *et al.*, 2001; Iwamoto *et al.*, 2003), and *Caloglossa leprieurii* (Karsten *et al.*, 1997), and  
110 from brown algae, namely *Spatoglossum pacificum*, *Dictyota dichotoma*, *Platymonas*  
111 *subcordiformis*, and *Laminaria digitata* (Ikawa *et al.*, 1972; Grant and Rees, 1981; Richter and  
112 Kirst, 1987); however, the genes encoding these enzymes have not yet been identified. Recent  
113 structural and functional genomics research on *E. siliculosus* has analyzed mannitol metabolism,  
114 and recombinant *Ectocarpus* M1PDHcat (EsiM1PDHcat; containing only the catalytic domain)  
115 and M1Pase2 (EsiM1Pase2) have been characterized (Rousvoal *et al.*, 2011; Groisillier *et al.*,  
116 2014; Bonin *et al.*, 2015). Determination of kinetic parameters indicated that EsiM1PDH1cat

117 displays higher catalytic efficiency for F6P reduction compared with M1P oxidation; EsiM1Pase2  
118 was shown to hydrolyze the phosphate group from M1P to produce mannitol but was not active on  
119 hexose monophosphates, such as glucose-1-phosphate (G1P), glucose-6-phosphate (G6P), and  
120 F6P. Gene expression analysis showed that transcription of these three genes from *E. siliculosus*  
121 (filamentous brown algae) was under the influence of the diurnal cycle, and *EsM1Pase1* was  
122 highly downregulated under hyposaline stress. However, these genes are still not well understood  
123 in *S. japonica* (large parenchyma brown algae).

124 In this study, *MIPDH* and *MIPase* genes and their corresponding proteins, which are  
125 involved in mannitol synthesis in *S. japonica*, were characterized. Gene expression analyses in  
126 different *Saccharina* tissue structures and samples from different stages of life cycle (including the  
127 sporophyte and gametophyte generations) and under abiotic stresses were conducted to understand  
128 the mechanisms regulating mannitol metabolism genes in Laminariales. The results of this study  
129 will expand our understanding of biosynthesis and degradation pathways and regulatory  
130 mechanism of carbohydrates and their ecophysiological and evolutionary significance in  
131 Laminariales and will provide a basis for artificial synthesis of mannitol *in vitro* and in transgenic  
132 plants for conferring salt tolerance.

133

## 134 **Materials and methods**

### 135 *Algal sample collection*

136 Preserved *S. japonica* haploid gametophytes (male and female gametophytes) were available as  
137 laboratory cultures and obtained from Laboratory of Genetics and Breeding of Marine Organisms.  
138 Fresh samples of the *Saccharina* sporophytes (rhizoids, stipe, blade tip, blade pleat, blade base,  
139 and blade fascia) were collected from east China (Rongcheng, Shandong Province, 37°8'53"N,  
140 122°34'33"E). To detect the influences of abiotic factors, the female gametophytes and blade base  
141 of sporophytes were cultured under different temperatures (control: 8°C; hyperthermia: 18°C),  
142 salinities (control: 30‰; hyposaline: 12‰), and circadian rhythms (control: 30 μmol photons/m<sup>2</sup>·s  
143 for 12 h; darkness: no irradiance for 12 h). These samples were used for RNA sequencing and  
144 digital polymerase chain reaction (PCR) analysis.

145

## 146 *Sequence analysis*

147 Based on the analysis of the *S. japonica* genome (NCBI accession number JXRI000000000.1, and  
148 resequencing genome data, Tao Liu, unpublished data) and transcriptome database (OneKP  
149 accession number OGZM), the unigenes related to *MIPase* were verified using the BLASTX  
150 algorithm (<http://blast.ncbi.nlm.nih.gov/Blast.cgi>). Multiple sequence alignment was performed  
151 with ClustalX (Thompson *et al.*, 1997). Sequence identities were calculated using the Clustal  
152 Omega tool (<http://www.ebi.ac.uk/Tools/msa/clustalo/>).

153

## 154 *Purification of recombinant proteins expressed in Escherichia coli*

155 Genes were synthesized (Shanghai Xuguan Biotechnological Development Co. LTD) to construct  
156 recombinant plasmids. *S. japonica MIPDH1* (*SjaMIPDH1*), *MIPDH2* (*SjaMIPDH2*), and  
157 *MIPase1* (*SjaMIPase1*) were cloned in pET32a and *S. japonica MIPase2* (*SjaMIPase2*) was  
158 cloned in pGEX-6p-1. These recombinant plasmids were transformed in *E. coli* BL21 (DE3) cells,  
159 and the integrity of their sequences was verified by sequencing. Isopropyl  
160  $\beta$ -D-1-thiogalactopyranoside was added at concentrations of 0.5 mM to induce overexpression of  
161 the target proteins, and the bacterial cultures were incubated for 16 h at 20°C. His-Binding-Resin  
162 and GST-Binding-Resin were used according to the manufacturer's instructions  
163 ([www.yuekebio.com](http://www.yuekebio.com)). The proteins were stored at -80°C.

164

## 165 *Assays for enzyme kinetics*

166 The *SjaMIPDH* and *SjaMIPase* activities of the purified enzymes were detected using previously  
167 described methods (Groisillier *et al.*, 2014; Bonin *et al.*, 2015). For enzymatic characterization,  
168 four sugar and polyol phosphoesters, which were considered potential substrates, were tested;  
169 these substrates were MIP, F6P, G1P, and G6P (Sigma, St. Louis, MO, USA). The effects of pH  
170 on the enzymatic activities of the purified proteins were determined in the range from 5.0 to 9.0  
171 for *SjaMIPDH* and 5.5 to 10.5 for *SjaMIPase*. The effects of temperature on these enzymes were  
172 determined over a range from 10°C to 60°C. The influence of NaCl was assessed over a final  
173 concentration range from 0 to 1000 mM in the reaction mixture. Four replicates were analyzed for  
174 each condition to ensure the consistency of the experimental results. In each case, boiled purified  
175 recombinant enzyme was used as a negative control.

176

## 177 *RNA sequencing and Droplet digital PCR*

178 Total RNA was extracted using an improved CTAB method (Gareth *et al.*, 2006). Three  
179 micrograms of RNA per sample was used as input material for the RNA sample preparation.  
180 Sequencing libraries were generated using NEBNext Ultra RNA Library Prep Kit for Illumina  
181 (NEB, USA) following the manufacturer's recommendations, and index codes were added to  
182 attribute sequences to each sample. The clustering of the index-coded samples was performed on a  
183 cBot Cluster Generation System using a TruSeq PE Cluster Kit v3-cBot-HS (Illumina) according  
184 to the manufacturer's instructions. After cluster generation, the library preparations were  
185 sequenced on an Illumina Hiseq platform, and 125-/150-bp paired-end reads were generated.  
186 HTSeq v0.6.1 was used to count the read numbers mapped to each gene. The fragments per  
187 kilobase of transcript per million mapped reads (FPKM) of each gene was then calculated based  
188 on the length of the gene and the reads count mapped to this gene. Droplet digital PCR analysis  
189 was conducted according to the previously described methods (Chi, *et al.*, 2017). The results  
190 represent mean values of three replicates. All the data were subjected to one-way analysis of  
191 variance followed by Student's *t*-tests.

192

## 193 **Results**

### 194 *Identification of brown algal mannitol metabolism genes*

195 Genomic sequencing data of *S. japonica* and transcriptomic data of 19 brown algal species  
196 belonging in Laminariales, Ectocarpales, Desmarestiales, Dictyotales, Fucales, and Ishigeales  
197 were identified by BLASTX analysis for mannitol metabolism genes. Two unigenes were found to  
198 be related to *MIPDH*s in most species (named *MIPDH1* and *MIPDH2* according to the naming  
199 convention for *E. siliculosus* *MIPDH*s), and only two Ectocarpales possessed the third *MIPDH*  
200 like *E. siliculosus* (Table S1). The identity between *MIPDH1* and *MIPDH2* within species was  
201 approximately 55.1–58.6%. *MIPase* genes showed more conservation in brown algae. All 19  
202 species contained two homologs of *MIPases*, which were named *MIPase1* and *MIPase2*, and  
203 their identity within species was 55.6–68.2% (Table S2). Only one *M2DH* was verified in 15  
204 Phaeophyceae species, and the identity between different species was approximately 69.9–72.8%

(Table S3). All 19 species contained two homologs of *HKs*, which were named *HK1* and *HK2*, and their identity within species was approximately 61.0–67.4% (Table S4).

*SjaM1PDH* and *SjaM1Pase* cDNA sequences were deposited in GenBank with accession numbers MF706368, MF706369, MF440344, and MF465902. After aligning brown algal M1PDH amino acid sequences, conserved blocks A to E of PSLDRs (defined by Klimacek *et al.*, 2003) were identified, while M1PDH1 and M1PDH3 had an additional extension N-terminal domain (Figure 1A). The comparison of M1Pases confirmed the conservation of brown algal M1Pases, including the catalytic machinery and the  $Mg^{2+}$  cofactor binding site (Figure 1B).

213

# *Characterization and confirmation of the functions of mannitol biosynthesis genes from S. japonica*

Native *SjaM1PDH2*, *SjaM1Pase1*, and *SjaM1Pase2* were overexpressed in *E. coli* to characterize the M1PDH and M1Pase activity of *S. japonica*. Although several attempts were made to overexpress *SjaM1PDH1*, no protein was observed, similar to *E. siliculosus M1PDH1*. The specificity of *SjaM1PDH2* was determined by assaying activity in presence of different potential substrates. Reduction of F6P, G6P, and G1P and oxidation of M1P, F6P, G6P, and G1P were tested. These experiments showed that the *SjaM1PDH2* enzyme only had reduction activity in the direction of mannitol synthesis; no oxidation activity was detected (Table 1). In addition, the reduction activity was also detected for other sugar substrates, indicating that *SjaM1PDH2* was not specific for F6P (Table 2). Purified *SjaM1PDH2* had a specific activity of 0.36  $\mu\text{mol}/\text{mg}$  protein/min for F6P reduction with NADH at pH 8.0. This activity was in the range of those measured for algal M1PDHs listed in Table 1. The *SjaM1Pase* activities were determined in 100 mM Tris-HCl buffer. The specific activity of *SjaM1Pase1* (144.93  $\mu\text{mol}/\text{mg}$  protein/min) was significantly higher (almost 22 times) than that of *SjaM1Pase2* (6.60  $\mu\text{mol}/\text{mg}$  protein/min) in the presence of 1 mM M1P (Table 3). The enzymatic reactions were performed in the presence of F6P, G1P, and G6P to investigate the substrate specificity of *SjaM1Pases*. The phosphatase activity was also detected for all sugar phosphates that were tested for each *Saccharina* protein. The activity of *SjaM1Pase1* for such substrates was always lower than for M1P, as was observed for most brown and red algae M1Pases (Table 4). However, *SjaM1Pase2* exhibited the highest phosphatase activity in the presence of G1P, which was almost 1.1 times that of M1P, and was similar to the



235 substrate specificity of M1Pase from *Dixoniella grisea*. In addition, more than 90% enzymatic  
236 activity was detected in SjaM1PDH2 and both SjaM1Pases after storage at 4°C for 72 h,  
237 suggesting that the recombinant proteins were quite stable under the purification conditions tested.

238

239 Table 1. Comparison of the biochemical characterization of M1PDH and its activity determined in  
240 brown and red algae.

|                                                | Specific activity<br>$/V_{max}$ ( $\mu\text{mol mg}$<br>$\text{protein}^{-1} \text{min}^{-1}$ ) | $K_m$<br>(mM)<br>M1P | $k_{cat}$<br>( $\text{s}^{-1}$ ) | pH<br>optimum | Temp<br>optimum<br>(°C) | References                   |
|------------------------------------------------|-------------------------------------------------------------------------------------------------|----------------------|----------------------------------|---------------|-------------------------|------------------------------|
| <b>Brown algae</b>                             |                                                                                                 |                      |                                  |               |                         |                              |
| <i>Saccharina japonica</i><br>(SjaM1PDH2)      | 0.36                                                                                            | 2.02                 | 0.44                             | 8.0           | 40                      | This study                   |
| <i>Ectocarpus siliculosus</i><br>(EsM1PDH1cat) | 46.2                                                                                            | 0.19                 | 32.3                             | 7.0           | 30                      | Bonin <i>et al.</i> , 2015   |
| <i>Spatoglossum pacificum</i>                  | 0.46                                                                                            | 0.28                 | NT                               | 6.5           | NT                      | Ikawa <i>et al.</i> , 1972   |
| <i>Platymonas subcordiformis</i>               | NT                                                                                              | 5.5                  | NT                               | 7.5           | NT                      | Richter and Kirst,<br>1987   |
| <b>Red algae</b>                               |                                                                                                 |                      |                                  |               |                         |                              |
| <i>Caloglossa continua</i>                     | 228                                                                                             | 0.15                 | NT                               | 7.2           | NT                      | Iwamoto <i>et al.</i> , 2003 |
| <i>Caloglossa leprieurii</i>                   | 0.26                                                                                            | 1.4                  | NT                               | 7.0           | NT                      | Karsten <i>et al.</i> , 1997 |
| <i>Dixoniella grisea</i>                       | 0.06                                                                                            | 1.18                 | NT                               | NT            | NT                      | Eggert <i>et al.</i> , 2006  |

241 NT: Not tested.

242

243 Table 2. Summary of M1PDH activity determined in brown and red algae. Percentages of  
244 maximum activities were calculated according to values reported in the different publications  
245 indicated below.

|                    | Fructose-6P | Glucose-6P | Glucose-1P | References |
|--------------------|-------------|------------|------------|------------|
| <b>Brown algae</b> |             |            |            |            |

|                                                |     |      |      |                            |
|------------------------------------------------|-----|------|------|----------------------------|
| <i>Saccharina japonica</i><br>(SjaM1PDH2)      | 100 | 98.7 | 96.3 | This study                 |
| <i>Ectocarpus siliculosus</i><br>(EsM1PDH1cat) | 100 | 0    | 0    | Bonin <i>et al.</i> , 2015 |
| <i>Spatoglossum pacificum</i>                  | 100 | 1.3  | 0    | Ikawa <i>et al.</i> , 1972 |
| <i>Platymonas subcordiformis</i>               | 100 | 0    | 0    | Richter and Kirst,<br>1987 |

### Red algae

|                              |     |      |   |                              |
|------------------------------|-----|------|---|------------------------------|
| <i>Caloglossa leprieurii</i> | 100 | 15.2 | 0 | Karsten <i>et al.</i> , 1997 |
| <i>Dixoniella grisea</i>     | 100 | 0.6  | 0 | Eggert <i>et al.</i> , 2006  |

246

247 Table 3. Comparison of the biochemical characterization of M1Pase and its activity determined in

248 brown and red algae.

|                                              | Specific activity/<br>$V_{max}$ ( $\mu\text{mol mg}^{-1} \text{min}^{-1}$ ) | $K_m$<br>(mM)<br>M1P | $k_{cat}$ ( $s^{-1}$ ) | pH<br>optimum | Temp<br>optimum<br>(°C) | References                          |
|----------------------------------------------|-----------------------------------------------------------------------------|----------------------|------------------------|---------------|-------------------------|-------------------------------------|
| <b>Brown algae</b>                           |                                                                             |                      |                        |               |                         |                                     |
| <i>Saccharina japonica</i><br>(SjaM1Pase1)   | 144.93                                                                      | 0.83                 | 128.02                 | 8.5           | 50                      | This study                          |
| <i>Saccharina japonica</i><br>(SjaM1Pase2)   | 6.60                                                                        | 0.02                 | 8.14                   | 8.5           | 30                      | This study                          |
| <i>Ectocarpus siliculosus</i><br>(EsM1Pase2) | 0.03                                                                        | 0.67                 | 0.02                   | 7.0           | NT                      | Groisillier <i>et al.</i> ,<br>2014 |
| <i>Dictyota dichotoma</i>                    | 10.22                                                                       | 0.83                 | NT                     | 7.0           | NT                      | Ikawa <i>et al.</i> , 1972          |
| <i>Spatoglossum pacificum</i>                | 79.3                                                                        | NT                   | NT                     | 7.0           | NT                      | Ikawa <i>et al.</i> , 1972          |
| <i>Laminaria digitata</i>                    | 1.12                                                                        | NT                   | NT                     | NT            | NT                      | Grant and Rees, 1981                |
| <b>Red algae</b>                             |                                                                             |                      |                        |               |                         |                                     |
| <i>Caloglossa continua</i>                   | 62.5                                                                        | 0.41                 | NT                     | 7.4           | NT                      | Iwamoto <i>et al.</i> , 2001        |
| <i>Caloglossa leprieurii</i>                 | 0.45                                                                        | 1.2                  | NT                     | 7.2           | NT                      | Karsten <i>et al.</i> , 1997        |

|  |                          |       |     |    |     |    |                             |
|--|--------------------------|-------|-----|----|-----|----|-----------------------------|
|  | <i>Dixoniella grisea</i> | 13.14 | 6.3 | NT | 7.3 | NT | Eggert <i>et al.</i> , 2006 |
|--|--------------------------|-------|-----|----|-----|----|-----------------------------|

249 NT: Not tested.

250

251 Table 4. Summary of M1Pase activity determined in brown and red algae. Percentages of  
252 maximum activities were calculated according to values reported in the different publications  
253 indicated below.

|                                              | Mannitol-1P | Glucose-1P | Glucose-6P | Fructose-6P | References                           |
|----------------------------------------------|-------------|------------|------------|-------------|--------------------------------------|
| <b>Brown algae</b>                           |             |            |            |             |                                      |
| <i>Saccharina japonica</i><br>(SjaM1Pase1)   | 100         | 27.5       | 21.3       | 8.7         | This study                           |
| <i>Saccharina japonica</i><br>(SjaM1Pase2)   | 89.9        | 100        | 69.6       | 34.8        | This study                           |
| <i>Ectocarpus siliculosus</i><br>(EsM1Pase2) | 100         | 0          | 0          | 0           | Groissillier <i>et al.</i> ,<br>2014 |
| <i>Dictyota dichotoma</i>                    | 100         | 0          | 0          | 0           | Ikawa <i>et al.</i> , 1972           |
| <i>Spatoglossum pacificum</i>                | 100         | 0          | 0          | 0           | Ikawa <i>et al.</i> , 1972           |
| <i>Laminaria digitata</i>                    | 100         | 11.3       | 3.1        | 0           | Grant and Rees, 1981                 |
| <b>Red algae</b>                             |             |            |            |             |                                      |
| <i>Caloglossa continua</i>                   | 100         | 0          | 0          | 1.8         | Iwamoto <i>et al.</i> , 2001         |
| <i>Caloglossa leprieurii</i>                 | 100         | NT         | NT         | 32.4        | Karsten <i>et al.</i> , 1997         |
| <i>Dixoniella grisea</i>                     | 18.2        | 100        | 5.0        | 11.6        | Eggert <i>et al.</i> , 2006          |

254 NT: Not tested.

255

256 The activities of the three purified proteins under different conditions of temperature and pH  
257 were determined to elucidate the biological characteristics of mannitol synthesis enzymes. Based  
258 on these experiments, the optimum temperature for SjaM1PDH2 was found to be 40°C, whereas  
259 the activities were 82% and 91% of the maximum activity at 30°C and 50°C. The optimum  
260 temperature for SjaM1Pase1 was 50°C, with 95% and 83% of residual activity at 40°C and 60°C,

261 respectively. The optimum temperature for SjaM1Pase2 was much lower (30°C), with the activity  
262 being less than 54% of the maximum activity at other temperatures (Figure 2A–C). The optimum  
263 pH for SjaM1PDH2 was determined to be 8.0, with 51% and 56% of residual activity at pH 7.0  
264 and 9.0, respectively. The optimum pH for both SjaM1Pase1 and SjaM1Pase2 was determined to  
265 be 8.5, and 78% of the SjaM1Pase2 activity remained intact at pH values from 7.5 to 9.5, whereas  
266 the corresponding activities for SjaM1Pase1 were less than 72% of the maximum activity (Figure  
267 2D–F).

268 The purified recombinant SjaM1PDH2 and SjaM1Pase proteins exhibited typical  
269 Michaelis-Menten kinetics when assayed with increasing concentrations of their substrates, and  
270 apparent  $V_{max}$  and  $K_m$  values were determined from the Lineweaver-Burk plots (Figure 3). The  $K_m$   
271 value for SjaM1PDH2 was 2.02 mM, which was about 10-fold higher than that for  
272 EsiM1PDH1cat (0.19 mM), indicating lower substrate binding capacity than EsiM1PDH1cat  
273 (Table 1). The substrate binding capacity of two *S. japonica* M1Pases showed large differences:  
274 the binding capacity of SjaM1Pase2 ( $K_m = 0.02$  mM) was highest (almost 21–315 times) among  
275 the M1Pases of other brown and red algae, almost 41 times higher than that of SjaM1Pase1 ( $K_m =$   
276 0.83 mM). Interestingly, both the SjaM1Pases showed much higher catalytic reaction efficiency  
277 and catalytic rates than EsM1Pase2 (Table 3); SjaM1Pase1 had the highest  $k_{cat}$  value (almost  
278 four-orders of magnitude higher than *Ectocarpus* M1Pase2).

279 The assays conducted to assess the influence of NaCl concentration on the activity of the  
280 recombinant *S. japonica* proteins showed a dose-dependent effect on SjaM1Pases (Figure 4A, B).  
281 A nearly linear decrease in activity was observed in the presence of NaCl at concentrations  
282 ranging from 0 to 1 M. About 60% of the initial activity remained intact in the presence of 1 M  
283 NaCl for both the enzymes, which indicated that these SjaM1Pases may resist high NaCl  
284 concentrations. However, SjaM1PDH2 activity was not affected by NaCl addition (Figure 4C).

285

## 286 *Transcriptomic analysis in mannitol metabolism*

287 The expression of mannitol synthesis genes from *S. japonica* was determined by analyzing the  
288 transcriptomic data of *S. japonica* (Tao Liu, unpublished data), as well as the transcriptomic data  
289 of 19 Phaeophytes published by us in the OneKP database ([www.onekp.com](http://www.onekp.com)). All the  
290 Phaeophyceae species expressed two *SjaM1Pase* genes, and more than 80% of Phaeophyceae

291 species expressed two *SjaMIPDH* genes.

292 To analyze the gene expression levels in different generations, tissues, sexes, and  
293 environmental conditions of *S. japonica*, RNA-seq and droplet digital PCR experiments were  
294 conducted. The regulation of metabolism in *Saccharina* is highly complex and can be divided into  
295 four general levels. First, the genes (including different gene family numbers) were all expressed  
296 constitutively. The gene expression levels were examined at various generations (female and male  
297 gametophytes; sporophytes) and in different tissues (rhizoids, stipe, blade tip, blade pleat, blade  
298 base, and blade fascia) of *Saccharina*. All four genes (including seven family numbers) were  
299 detected in different samples (Figure 5). The FPKM value range of *Saccharina* transcripts was  
300 approximately 1.2–300 (Table 5).

301 Second, most pathway genes encode reversible enzymes, which control the balance between  
302 mannitol and F6P and dynamically maintain the “saccharide pool” *in vivo*. As a circular pathway,  
303 mannitol metabolism is closely related to alginate, fucoidan, laminarin, and trehalose metabolism  
304 through the intermediate product F6P. The first gene that transforms F6P to mannitol is *MIPDH*  
305 (*MIPDH1* and *MIPDH2*), and the first gene that transforms into alginate and fucoidan is mannose  
306 phosphate isomerase *MPI* (*MPI1* and *MPI2*) (Chi *et al.*, 2017). The expression levels of  
307 *SjaMIPDH* and *SjaMPI* were opposite in most tissues (Figure 6). For example, the expression  
308 level of *SjaMPI1* was 3.8 times that of *SjaMIPDH1* in blade fascia, whereas the expression level  
309 of *SjaMIPDH1* was 2.7 times that of the *SjaMPI1* in stipe.

310 Third, enzyme activity and gene expression analyses were used to determine the dominant  
311 genes in mannitol synthesis. The mannitol synthesis pathway includes two genes, *MIPDH* and  
312 *MIPase*; the former catalyzes the reversible reaction, and the latter only catalyzes the positive  
313 reaction. Regarding the two *MIPase* family members, the expression of *SjaMIPase1* in different  
314 tissues was significantly higher than that of *SjaMIPase2* (the former was 2.0–19.4 times that of  
315 the latter; Figure 7). The expressional levels of *SjaMIPase2* in different tissues were not  
316 significantly different, but were adversely affected by *SjaMIPase1* under hyperthermia (18°C)  
317 stress. *SjaMIPase2* was obviously upregulated 2.0 times, whereas *SjaMIPase1* was  
318 downregulated 2.0 times.

319 Finally, the overall gene expression profiles differed between the gametophyte and  
320 sporophyte generations. The average gene expression levels in the gametophyte and sporophyte

generations were further compared. Most genes (*SjaM1PDH1*, *SjaM1Pase1*, *SjaM2DH*, *SjaHK1*, and *SjaHK2*) were expressed at significantly higher levels in sporophytes than in gametophytes, with increases of 2.8-, 7.3-, 3.1-, 5.6-, and 4.7-fold, respectively (Figure 8A). However, the expression levels of *SjaM1PDH2* and *SjaM1Pase2* did not differ significantly between the two generations. In addition, there were no significant differences in the expression of all pathway genes in female and male gametophytes (Figure 8B). To complete these observations, further analysis was focused on changes in the expression of the genes using algal samples subjected to abiotic stress. Interestingly, these genes in different generations had the opposite response mechanisms to environmental stress. Under hyposaline conditions, the transcript levels of all genes were upregulated, exhibiting increases of 1.2–16.2-fold in gametophytes. In contrast, the expression levels of all genes were decreased 1.9–3.7-fold in sporophytes (Table 5). Furthermore, these variations followed a similar trend under hyperthermic stress. The transcript levels of all genes were upregulated (1.2–12.5 times) in gametophytes, whereas most genes (except *SjaM1PDH2* and *SjaM1Pase2*) were downregulated (1.4–3.0 times) in sporophytes (Table 5).

Table 5. The upregulated and downregulated ratios of the gene FPKM doses under hyposaline (12‰) and hyperthermia (18°C) conditions.

| Genes             | Sporophytes            |                          | Gametophytes           |                          |
|-------------------|------------------------|--------------------------|------------------------|--------------------------|
|                   | Control/<br>Hyposaline | Control/<br>Hyperthermia | Hyposaline/<br>Control | Hyperthermia/<br>Control |
| <i>SjaM1PDH1</i>  | 2.9                    | 2.0                      | 3.7                    | 1.9                      |
| <i>SjaM1PDH2</i>  | 3.7                    | 0.2                      | 1.2                    | 7.9                      |
| <i>SjaM1Pase1</i> | 1.9                    | 3.0                      | 1.9                    | 2.7                      |
| <i>SjaM1Pase2</i> | 3.5                    | 0.5                      | 2.0                    | 1.2                      |
| <i>SjaM2DH</i>    | 2.7                    | 1.7                      | 16.2                   | 12.5                     |
| <i>SjaHK1</i>     | 3.6                    | 2.9                      | 4.6                    | 1.3                      |
| <i>SjaHK2</i>     | 3.5                    | 1.4                      | 6.6                    | 2.3                      |

## Discussion

*Mannitol metabolism genes were constitutively expressed in brown algae, which satisfied the requirement for mannitol synthesis and accumulation for physiological*

## 342 *metabolism*

343 Mannitol is the fundamental carbon-storage molecule and osmotic regulator in brown algae, and  
 344 mannitol metabolism is one of the main traits that makes brown algae unique compared with other  
 345 eukaryotic algae (Shao *et al.*, 2014). As a basal metabolic pathway, mannitol metabolism has  
 346 fewer pathway steps (a total of four steps) and relatively few gene family members (1–2 copies of  
 347 each gene in most brown algae). This mechanism differs obviously from some special elements,  
 348 such as halogen metabolism (about 89 gene family members in *S. japonica*, unpublished data),  
 349 and because of the single product (mannitol), this pathway does not contain complex synthesis and  
 350 modification genes, such as glycosyltransferase, sulfurtransferase, and mannuronate  
 351 C5-epimerases genes, as observed in alginate and fucoidan metabolism (which contain dozens to  
 352 more than 100 genes) (Chi *et al.*, 2017). Therefore, analysis of mannitol metabolism is critical for  
 353 the study of pathway regulation and environmental adaptation of brown algae.

354 Of the four pathway genes, *MIPDH*, *MIPase*, and *HK* genes have a “backup” gene (only  
 355 *M2DH* has one copy). Moreover, about 80% of brown algal species in our analysis also harbor  
 356 similar gene numbers. There are three *MIPDH* unigenes in *E. siliculosus*, but only two copies are  
 357 found in the *S. japonica* genome. The transcriptomic data of 19 Phaeophyceae species also  
 358 identified two *MIPDH* copies expressed in brown algae, except Ectocarpales. To confirm the  
 359 *MIPDH* gene duplicates in brown algae, genome sequencing data of *Undaria pinnatifida* and  
 360 *Costaria costata* (both belonging to Laminariales) were analyzed; these organisms were both  
 361 found to possess *MIPDH1* and *MIPDH2*. The third unigene of *MIPDH* in Ectocarpales may be  
 362 explained by the duplication of an *MIPDH1* sequence (Tonon *et al.*, 2017). Unlike in other  
 363 primary endosymbiotic (e.g., red algae) and secondary endosymbiotic (e.g., Dictyochophyceae)  
 364 algae, which have only one gene copy (Tonon *et al.*, 2017), brown algae have two *MIPase* genes  
 365 (Table S2). Transcriptome analysis demonstrated that all four genes were constitutively expressed  
 366 (at least at the RNA level) in brown algae. In addition, further investigations revealed that these  
 367 genes are also constitutively expressed at various generations and in different tissues (Figure 5;  
 368 Table S5). Even under dark conditions, all genes in the pathway were detected (the FPKM dose  
 369 was 12.0–158.8, Table S5). During the development of *Saccharina*, zygotes divide continuously  
 370 from a single cell to form thallus sporophytes, which exhibit consistent increases in length, width,  
 371 and thickness. Mannitol is a central compound in plant carbon metabolism and in transportation

and distribution of the organic assimilate. Moreover, mannitol has important physiological functions, such as osmotic regulation, antioxidant, thermal protection, and respiration substrate (Schmitz, *et al.*, 1972; Davison & Reed, 1985). Therefore, these results suggest that brown algae consistently synthesize mannitol for carbon storage and energy.

### *Specific expression and regulation of the circular metabolism*

*Saccharina* mannitol metabolism is a unique circular metabolic pathway, having few steps (four genes, seven copies), i.e., far less than other metabolic pathways such as alginate (six genes, 133 copies) (Chi *et al.*, 2017), fucoidin (nine genes, 71 copies) (Chi *et al.*, 2017), and trehalose (three genes, 11 copies) (Chi *et al.*, 2015; unpublished data) pathways. As the shared substrate, F6P can be used to synthesize other basic metabolites, such as alginate and fucoidan, and the regulation of mannitol synthesis genes in Laminariales could involve a complex integrated system. For example, the expression level of the first gene in mannitol, alginate, and fucoidan metabolic pathways was found to differ substantially among tissues (Figure 6), indicating that more F6P could be utilized in the synthesis of alginate and fucoidan. This is consistent with the finding that the accumulation of mannitol has an inverse relationship with that of alginate and fucoidan (Kaliaperumal and Kalimuthu, 1976; Ji, 1963). Mannitol metabolism can finely regulate the balance between mannitol and F6P and further affect other related pathways, such as alginate and fucoidan, which function to maintain the “saccharide pool” *in vivo*.

### *The analysis of enzyme activity and gene expression reveals that MIPase1 is the dominant gene of mannitol synthesis*

As the enzyme catalyzing the positive reaction, MIPase may be the rate-limiting gene for mannitol synthesis. Although the two copies of MIPase were found to be expressed constitutively, there were major differences in their enzyme activities and expression patterns.

MIPase enzymes exhibit mannitol biosynthesis activity and have different biochemical properties. In brown algae, only one homolog of the *MIPase* gene (*MIPase2*) was confirmed to show activity in *E. siliculosus* (Groisillier *et al.*, 2014; Bonin *et al.*, 2015). No enzymatic studies have been conducted for *MIPase1*; only their nucleotide sequences were reported from *E. siliculosus*. In this study, SjaMIPase1 and SjaMIPase2 were both confirmed to have MIPase



activity and were assumed to be involved in the mannitol biosynthesis pathway in brown algae (Figure 2). The specific enzyme activity of SjaM1Pase1 was much higher (21.9 times) than that of SjaM1Pase2, and the former enzyme had a higher  $k_{cat}$  value (15.7 times) than that of the latter (Table 3). This indicated that SjaM1Pase1 had stronger catalytic ability than SjaM1Pase2. In terms of expression levels, SjaM1Pase1 also showed significantly higher expression than SjaM1Pase2 in all tissues (Figure 7). These results suggested that *SjaM1Pase1* was the dominant gene in mannitol synthesis and was mainly responsible for the synthesis and accumulation of mannitol, whereas *SjaM1Pase2* acted as a backup, having an important role under some conditions. For example, when *SjaM1Pase1* was downregulated under hyperthermic stress in sporophytes, *SjaM1Pase2* exhibited the opposite response mechanism under the same temperature stress.

All genes and copies (family members) of mannitol metabolism in *S. japonica* are involved in mannitol metabolism and show the characteristic of higher expression for the dominant gene. Multiple copies of genes are important for maintaining the normal biochemical metabolism in evolution. Mannitol metabolism gene duplication is an important biological mechanism to maintain the core photosynthetic carbon storage in *S. japonica*. Different copies of genes were still transcribed, and their gene products exhibited activity conducive to avoiding the influence of gene loss, recombination, and mutation on gene integrity and enzyme function. Interestingly, most genes were downregulated under hyperthermic stress in sporophytes, whereas *SjaM1PDH2* and *SjaM1Pase2* were upregulated (about 5.6 and 2.0 times, respectively; Figure 7, Table S5). These findings suggested that there were different mechanisms of regulation for backup genes.

### *Complex regulation of the expression of mannitol metabolism-related genes revealed the importance of this process in the evolution (filamentous and thallus) and environmental adaptation of brown algae*

Laminariales algae have a heteromorphic haploid-diploid life cycle, with a macroscopic thallus sporophyte and microscopic gametophyte among different generations (Bartsch *et al.*, 2008). Most mannitol metabolism genes (except *SjaM1PDH2* and *SjaM1Pase2*) had significantly higher expression in sporophytes (filamentous generation) than in gametophytes (thallus generation; Figure 8A). This is consistent with the results of our mannitol content analysis in *Saccharina*, in which the dry weight of mannitol was found to be lower in gametophytes (male gametophytes

432 with 23.4% and female gametophytes with 24.6%) than in sporophytes (26.3%). These results  
433 indicated that the sporophytes may have much higher ability to synthesize mannitol, potentially  
434 because the sporophytes (large thallus with tissue differentiation) require more mannitol synthesis  
435 and degradation to satisfy normal growth and development and adapt to the changing environment.  
436 However, there were no significant differences in gene expression between female and male  
437 gametophytes (Figure 8B). This is also consistent with our observation that the mannitol contents  
438 in male and female gametophytes were 23.4% and 24.6%, respectively, suggesting that different  
439 sexes of gametophytes had similar mechanisms for regulating mannitol metabolism.

440 The mechanisms regulating mannitol metabolism in response to environmental stress are  
441 opposite between different generations. Under hyposaline stress, all genes in gametophytes were  
442 upregulated, consistent with the results observed in *MIPase2* from *E. siliculosus* (Grosillier *et al.*,  
443 the 2014), whereas the sporophyte genes were all downregulated (Figure 9A). Similar results were  
444 observed under hyperthermic conditions (Figure 9B). Notably, mannitol is the main organic  
445 osmolyte in *Saccharina* and most other brown algae, countering salinity stress and acting as an  
446 antioxidant and heat protectant (stabilization of proteins) (Schmitz *et al.*, 1972; Davison and Reed,  
447 1985; Iwamoto and Shiraiwa, 2005). The gametophyte stage is the stage that is most vulnerable to  
448 external stress in the entire life-history of the organism (Ye *et al.*, 2015). Therefore, during this  
449 stage, mannitol metabolism is increased to respond to stress, particularly as an osmotic adjustment  
450 substance to quickly respond to hyposaline stress, maintain intracellular osmotic pressure, and  
451 protect algae against hyperthermia-induced damage. Distinct regions of carbon sources and carbon  
452 sinks exist along the thalli because of their large size and differentiation (Schmitz and Lobban,  
453 1976; Buggeln, 1983). *Saccharina* involves transport from source to sink, i.e., from mature blade  
454 areas, which produce a surplus of photoassimilates, to the intercalary carbon-requiring meristems  
455 (Bartsch *et al.*, 2008). The imported organic compounds in the sink tissues are rapidly metabolized  
456 and incorporated into polysaccharides and proteins (Schmitz and Lobban, 1976). The blade base  
457 of the sporophytes (meristem) exhibited reduced mannitol metabolism, probably related to  
458 reduction of mannitol degradation and incorporation, thereby decreasing transportation from  
459 carbon sources to carbon sinks and maintaining mannitol accumulation in mature blades to adapt  
460 to stress.

461

## 462 *Comparative analysis of RNA-seq and droplet digital PCR*

463 The droplet digital PCR method was used to verify the transcriptional sequencing results. The  
 464 gene expression in gametophytes was analyzed under stresses (hyposaline and hyperthermia).  
 465 Most of the genes were upregulated under these stress conditions, consistent with the results of  
 466 RNA-seq. For example, *SjaMIPDH1* increased by 4.0 and 1.3 times under hyposaline and  
 467 hyperthermia stresses, respectively, as determined by droplet digital PCR analysis, whereas  
 468 RNA-seq analysis showed that *SjaMIPDH1* increased by 3.7 and 1.9 times under the same  
 469 conditions (Table S6). RNA-seq and droplet digital PCR analyses yielded similar experimental  
 470 results. Notably, droplet digital PCR was relatively inexpensive and had a shorter experimental  
 471 time, whereas RNA-seq was beneficial for further analysis of the relationship between mannitol  
 472 metabolism and other pathways.

## 474 *Characterization of mannitol synthesis genes in brown algae may provide more* 475 *effective genes for industrial production of mannitol and for plant genetic breeding*

476 Mannitol is a commercially valuable compound and is now widely used in the food,  
 477 pharmaceutical, medical, and chemical industries (Saha and Racine, 2011; Song and Vieille, 2009).  
 478 Most of the commercial production of mannitol is carried out by chemical hydrogenation of  
 479 fructose, or it is extracted from seaweed (Saha and Racine, 2011; Xia *et al.*, 2016). Because of the  
 480 problems associated with chemical production and extraction, microbial production has been the  
 481 subject of significant interest in recent years (De Guzman, 2005; Saha and Racine, 2011). The  
 482 most widely used *MIPase* gene from a protozoan parasite *Eimeria tenella* (Liberator *et al.*, 1998)  
 483 had been expressed in cyanobacterium (Jacobsen and Frigaard, 2014), proteobacteria  
 484 (Reshamwala *et al.*, 2014), and firmicutes (Wisselink *et al.*, 2005) and resulted in the  
 485 accumulation of mannitol in the cells and in the culture medium. Interestingly, the substrate  
 486 binding capacity of *E. tenella* MIPase ( $K_m = 0.07$  mM) was lower than that of *SjaMIPase2* ( $K_m =$   
 487  $0.02$  mM), and its catalytic efficiency ( $k_{cat} = 430$  s<sup>-1</sup>) was much lower than that of *SjaMIPase1*  
 488 ( $k_{cat} = 6453.5$  s<sup>-1</sup>), which indicated that the *MIPase* genes from brown algae may be better  
 489 candidates for microbial production. Furthermore, mannitol biosynthesis is one of the most  
 490 extensively tested targets for improving salt tolerance in plants by genetic engineering (Iwamoto  
 491 and Shiraiwa, 2005). The high salinity tolerance of transgenic plants may due to the accumulation

of mannitol in the cells (Tarczynski *et al.*, 1992, 1993; Karakas *et al.*, 1997). The introduction of algal genes in transgenic plants may confer a greater advantage in terms of salt tolerance (Iwamoto *et al.*, 2001). The analysis of genes in the mannitol synthesis pathway can provide enzymes with higher substrate specificity and specific activity that would be useful for plant breeding research in the future.

## Acknowledgements

This work was supported by the National Natural Science Foundation of China (NSFC No. 41376143), Leading Talents Program in Taishan Industry of Shandong Province, Leading Talents Program in Entrepreneurship and Innovation of Qingdao, China-ASEAN Maritime Cooperation Fund “China-ASEAN Center for Joint Research and Promotion of Marine Aquaculture Technology”, and China Agriculture Research System (CARS-50).

## Figure legends

Figure 1. Structure-based sequence alignment of SjaM1PDHs (A) and SjaM1Pases (B). A. Alignment of the M1PDH from *Saccharina japonica* and some other brown algae species. Five conserved blocks as defined by Klimacek *et al.* (2003) for PSLDRs, named A to E, are represented above the conserved consensus sequence. B. Alignment of the crystallized HAD-like protein ATU0790 from *Agrobacterium tumefaciens* strain C58 (PDB code 2FDR) with orthologs of M1Pases from different organisms. Motifs I to IV, defined according to Burroughs *et al.* (2006), are represented above the conserved consensus sequence.

Figure 2. Enzymatic characteristics of recombinant SjaM1PDH2 and SjaM1Pases. A. Influence of temperature on SjaM1PDH2 activity. Enzyme activity at 40°C was set to 100%.  $P < 0.05$  compared to 40°C. B. Influence of temperature on SjaM1Pase1 activity. Enzyme activity at 50°C was set to 100%.  $P < 0.05$  compared to 50°C. C. Influence of temperature on SjaM1Pase2 activity. Enzyme activity at 30°C was set to 100%.  $P < 0.01$  compared to 30°C. D. Influence of different pH on the activity of SjaM1PDH2. Enzyme activity at pH 8.0 was set to 100%.  $P < 0.01$  compared to pH 8.0. E. Influence of different pH on the activity of SjaM1Pase1. Enzyme activity at pH 8.5 was set to 100%.  $P < 0.01$  compared to pH 8.5. F. Influence of different pH on the

521 activity of SjaM1Pase2. Enzyme activity at pH 8.5 was set to 100%.  $P < 0.05$  compared to pH 8.5.

522 The values represent means  $\pm$  SD calculated from three assays.

523 Figure 3. Kinetics of enzymatic activity of SjaM1PDH2 (A), SjaM1Pase1 (B) and SjaM1Pase2

524 (C). The values represent means  $\pm$  SD calculated from three assays.

525 Figure 4. Influence of NaCl concentration on the activities of recombinant SjaM1Pase1 (A),

526 SjaM1Pase2 (B) and SjaM1PDH2 (C). The values represent means  $\pm$  SD calculated from three

527 assays.

528 Figure 5. Expression levels of mannitol metabolism genes in different generations (sporophytes

529 and gametophytes) and tissues (rhizoids, stipe, blade tip, blade pleat, blade base, and blade fascia).

530 All genes were constitutive expressed in different samples.

531 Figure 6. Expression levels of *SjaM1PDHs* and *SjaMPIs* in different tissues (rhizoids, stipe, blade

532 tip, blade pleat, blade base, and blade fascia). The expression levels of *SjaM1PDHs* and *SjaMPIs*

533 were opposite in most tissues.

534 Figure 7. Expression levels of *SjaM1Pases* in different tissues (rhizoids, stipe, blade tip, blade

535 pleat, blade base, and blade fascia) and under hyperthermic stress. The expression of *SjaM1Pase1*

536 was higher than that of *SjaM1Pase2* in all tissues. The expressional level of *SjaM1Pase2* was

537 adversely affected by *SjaM1Pase1* under hyperthermia (18°C) stress.

538 Figure 8. (A) Expression levels of mannitol metabolism genes at different generations

539 (gametophytes and sporophytes). Most of the gene transcript levels of sporophytes were much

540 higher than that of gametophytes ( $P < 0.05$ ). (B) Expression levels of mannitol metabolism genes

541 at different sexse (female gametophytes and male gametophytes). No significant differences were

542 observed between these samples.

543

## 544 References

545 **Bartsch I, Wiencke C, Bischof K, et al.** 2008. The genus *Laminaria sensu lato*: recent insights

546 and developments. *European Journal of Phycology* **43**, 1–86.

547 **Belcher R, Nutten AJ.** 1960. *Quantitative Inorganic Analysis* (2nd ed.). London, UK:

548 Butterworths 194.

549 **Belkin S, Boussiba S.** 1991. Resistance of *Spirulina platensis* to ammonia at high pH values.

550 Plant Cell Physiol **32**, 953–958.

551 **Black WAP.** 1948. The seasonal variation in chemical constitution of some of the sub-littoral  
 552 seaweeds common to scotland. Part III. *laminaria saccharina* and *saccorhiza bulbosa*. Journal of  
 553 the society of chemical industry. **67**, 172–176.

554 **Bonin P, Groisillier A, Raimbault A, Guibert A, Boyen C, Tonon T.** 2015. Molecular and  
 555 biochemical characterization of mannitol-1-phosphate dehydrogenase from the model brown alga  
 556 *Ectocarpus* sp. Phytochemistry **117**, 509–520.

557 **Buggeln RG.** 1983. Photoassimilate translocation in brown algae. Prog Phycol Res **2**, 283–332.

558 **Cock JM, Godfroy O, Macaisne N, Peters AF, Coelho SM.** 2014. Evolution and regulation of  
 559 complex life cycles: a brown algal perspective. Curr Opin Plant Biol **17**, 1–6.

560 **Cock JM et al.** 2010. The *Ectocarpus* genome and the independent evolution of multicellularity  
 561 in brown algae. Nature **465**, 617–621.

562 **Davison IR, Reed RH.** 1985. The physiological significance of mannitol accumulation in brown  
 563 algae: the role of mannitol as a compatible cytoplasmic solute. Phycologia **24**, 449–457.

564 **Devillé C, Damas J, Forget P, Dandrifosse G, Peulen O.** 2004. *Laminarin* in the dietary fibre  
 565 concept. J Sci Food Agric **84**, 1030–1038.

566 **Dickson DMJ, Kirst GO.** 2010. Osmotic adjustment in marine eukaryotic algae: the role of  
 567 inorganic ions, quaternary ammonium, tertiary sulphonium and carbohydrate solutes. i. diatoms  
 568 and a rhodophyte. New Phytologist, **106**, 645–655.

569 **Dittami SM, Aas HTN, Paulsen BS, Boyen C, Edvardsen B, Tonon T.** 2011. Mannitol in six  
 570 autotrophic stramenopiles and *Micromonas*. Plant Signaling and Behavior **6**, 1237–1239.

571 **Dittami SM, Gravot A, Goulitquer S, Rousvoal S, Peters AF, Bouchereau A, Boyen C, Tonon**  
 572 **T.** 2012. Towards deciphering dynamic changes and evolutionary mechanisms involved in the  
 573 adaptation to low salinities in *Ectocarpus* (brown algae). Plant J **71**, 366–377.

574 **Eggert A, Raimund S, Van Den Daele K, Karsten U.** 2006. Biochemical characterization of  
 575 mannitol metabolism in the unicellular red alga *Dixoniella grisea* (Rhodellophyceae). European  
 576 Journal of Phycology **41**, 405–413.

577 **FAO.** 2016. The State of Food and Agriculture 2015. FAO, Rome, Italy

578 **Grant CR, Rees T.** 1981. Sorbitol metabolism by apple seedlings. Phytochemistry **20**,  
 579 1505–1511.

580 **Groisillier A, Shao Z, Michel G, Goulitquer S, Bonin P, Krahulec S, Nidetzky B, Duan D,**  
581 **Boyen C, Tonon T.** 2014. Mannitol metabolism in brown algae involves a new phosphatase  
582 family. *Journal of Experimental Botany* **65**, 559–570.

583 **Gylle AM, Nygård CA, Ekelund NGA.** 2009. Desiccation and salinity effects on marine and  
584 brackish *Fucus vesiculosus* L. (Phaeophyceae). *Phycologia* **48**, 156–164.

585 **Hellebust JA.** 1965. Excretion of some organic compounds by marine phytoplankton. *Limnology*  
586 and *Oceanography* **10**, 192–206.

587 **Ikawa T, Watanabe T, Nisizawa K.** 1972. Enzymes involved in the last steps of the biosynthesis  
588 of mannitol in brown algae. *Plant and Cell Physiology* **13**, 1017–1029.

589 **Iwamoto K, Kawanobe H, Shiraiwa Y, Ikawa T.** 2001. Purification and characterization of  
590 mannitol-1-phosphate in the red alga *Caloglossa continua* (Ceramiales, Rhodophyta). *Marine*  
591 *Biotechnology* **3**, 493–500.

592 **Iwamoto K, Shiraiwa Y.** 2003. Characterization of Salt-Regulated Mannitol-1-Phosphate  
593 Dehydrogenase in the Red Alga *Caloglossa continua*. *Plant Physiology* **133**, 893–900.

594 **Iwamoto K, Shiraiwa Y.** 2005. Salt-regulated mannitol metabolism in algae. *Mar Biotechnol* (NY)  
595 **7**, 407–415.

596 **Jacobsen JH, Frigaard NU.** 2014. Engineering of photosynthetic mannitol biosynthesis from  
597 CO<sub>2</sub> in a cyanobacterium. *Metabolic Engineering*, **21**, 60–70.

598 **Ji MH, Pu SZ, Ji XL.** 1980. Studies on the initial products of <sup>14</sup>C metabolism in *Laminaria*  
599 *japonica*. *Chinese Journal of Oceanology and Limnology* **11**, 229–240 (in Chinese).

600 **Kaliaperumal N, Kalimuthu S.** 1976. Changes in growth, reproduction, alginic acid and  
601 mannitol contents of *Turbinaria decurrens* Bory. *Botanica Marina* **19**, 157–160.

602 **Karakas B, Ozias-Akins P, Stushnoff C, Suefferheld M, Rieger M.** 1997. Salinity and drought  
603 tolerance of mannitol accumulating transgenic tobacco. *Plant Cell Environ* **20**, 609–616.

604 **Karsten U, Thomas DN, Weykam G, Daniel C, Kirst GO.** 1991. A simple and rapid method for  
605 extraction and separation of low molecular weight carbohydrates from macroalgae using high  
606 performance liquid chromatography. *Plant Physiology and Biochemistry* **29**, 373–378.

607 **Karsten U, Barrow KD, Nixdorf O, West JA, King RJ.** 1997. Characterization of mannitol  
608 metabolism in the mangrove red alga *Caloglossa leprieurii* (Montagne). *J Agardh Planta* **201**,  
609 173–178.

610 **Klimacek M, Kavanagh KL, Wilson DK, Nidetzky B.** 2003. *Pseudomonas fluorescens* mannitol  
611 2-dehydrogenase and the family of polyol-specific longchain dehydrogenases/reductases:  
612 sequence-based classification and analysis of structure-function relationships. *Chem Biol Interact*  
613 **143**, 559–582.

614 **Knoll AH.** 2011. The multiple origins of complex multicellularity. *Annu Rev Earth Planet Sci* **39**,  
615 217–239.

616 **Kremer BP.** 1980. Transversal profiles of carbon assimilation in the fronds of three *Laminaria*  
617 species. *Mar Biol* **59**, 95–103.

618 **Liberator P, Anderson J, Feiglin M, Sardana M, Griffin P, Schmatz D, Myers RW.** 1998.  
619 Molecular cloning and functional expression of mannitol-1-phosphatase from the apicomplexan  
620 parasite *Eimeria tenella*. *J Biol Chem* **273**, 4237–4244.

621 **Liu F, Pang SJ.** 2015. Mitochondrial genome of *Turbinaria ornata* (Sargassaceae, Phaeophyceae):  
622 comparative mitogenomics of brown algae. *Curr Genet* **61**, 621–631.

623 **Michel G, Tonon T, Scornet D, Cock JM, Kloareg B.** 2010. The cell wall polysaccharide  
624 metabolism of the brown alga *Ectocarpus siliculosus*. Insights into the evolution of extracellular  
625 matrix polysaccharides in Eukaryotes. *New Phytologist* **188**, 82–97.

626 **Niklas KJ, Newman SA.** 2013. The origins of multicellular organisms. *Evol Dev* **15**, 41–52.

627 **Norton TA.** 1991. Conflicting constraints on the form of intertidal algae. *British Phycological*  
628 *Journal* **26**, 203–218.

629 **Patel TK, Williamson JD.** 2016. Mannitol in plants, fungi, and plant–fungal interactions. *Trends*  
630 *in Plant Science* **21**, 486–497.

631 **Percival E, McDowell RH.** 1967. *Chemistry and enzymology of marine algal polysaccharides*.  
632 London: Academic Press.

633 **Reed RH, Davison IR, Chudek JA, Foster R.** 1985. The osmotic role of mannitol in the  
634 Phaeophyta: an appraisal. *Phycologia* **24**, 35–47.

635 **Reshamwala SM, Pagar SK, Velhal VS, Maranholakar VM, Talangkar VG, Lali AM.** 2014.  
636 Construction of an efficient *Escherichia coli* whole-cell biocatalyst for D-mannitol production. *J*  
637 *Biosci Bioeng* **118**, 628–631.

638 **Richter DF, Kirst GO.** 1987. D-Mannitol dehydrogenase and D-mannitol-1-phosphate  
639 dehydrogenase in *Platymonas subcordiformis*: some characteristics and their role in osmotic



640 adaptation. *Planta* **170**, 528–534.

641 **Rousvoal S, Groisillier A, Dittami SM, Michel G, Boyen C, Tonon T.** 2011.

642 Mannitol-1-phosphate dehydrogenase activity in *Ectocarpus siliculosus*, a key role for mannitol

643 synthesis in brown algae. *Planta* **233**, 261–273.

644 **Saha BC, Racine FM.** 2011. Biotechnological production of mannitol and its applications. *Appl*

645 *Microbiol Biotechnol* **89**, 879–891.

646 **Schmitz K.** 1981. Translocation. In *Biology of Seaweeds* (Lobban, C.S. & Wynne, M.J., editors).

647 Blackwell, Oxford, UK, 534–558.

648 **Schmitz K, Lobban CS.** 1976. A survey of translocation in Laminariales (Phaeophyceae). *Mar*

649 *Biol* **36**, 207–216.

650 **Schmitz K, Lüning K, Willenbrink J.** 1972. CO<sub>2</sub>-Fixierung und Stoff transport in benthischen

651 marinen Algen. 2. Zum Ferntransport <sup>14</sup>C-markierter Assimilate bei *Laminaria hyperborean* und *L.*

652 *saccharina*. *Z Pflanzenphysiol* **67**, 418–429.

653 **Schmittgen TD, Zakrajsek BA, Mills AG, Gorn V, Singer MJ, Reed MW.** 2000. Quantitative

654 reverse transcription-polymerase chain reaction to study mRNA decay: comparison of endpoint

655 and real-time methods. *Anal Biochem* **285**, 194–204.

656 **Shao Z, Zhang P, Li Q, Wang X, Duan D.** 2014. Characterization of mannitol-2-dehydrogenase

657 in *Saccharina japonica*: evidence for a new polyol-specific long chain dehydrogenases/reductase.

658 *PLoS One* **9**, e97935.

659 **Song S, Vieille C.** 2009. Recent advances in the biological production of mannitol. *Appl*

660 *Microbiol Biotechnol* **84**, 55–62.

661 **Tarczynski MC, Jensen RG, Bohnert HJ.** 1992. Expression of a bacterial mtlD gene in

662 transgenic tobacco leads to production and accumulation of mannitol. *Proc Natl Acad Sci USA* **89**,

663 2600–2604.

664 **Tarczynski MC, Jensen RG, Bohnert HJ.** 1993. Stress protection of transgenic tobacco by

665 production of the osmolyte mannitol. *Science* **259**, 508–510.

666 **Thompson JD, Gibson TJ, Plewniak F, Jeanmougin F, Higgins DG.** 1997. The ClustalX

667 windows interface: flexible strategies for multiple sequence alignment aided by quality analysis

668 tools. *Nucleic Acids Research* **24**, 4876–4882.

669 **Tonon T, Li Y, McQueen-Mason S.** 2017. Mannitol biosynthesis in algae: more widespread and

670 diverse than previously thought. *New Phytol* **213**, 1573–1579.

671 **Tseng CK.** 1987. *Laminaria* mariculture in China. In *Case Studies of seven Commercial Seaweed*

672 *Resources*. FAO Fisheries Technical Paper **281**, 239–263.

673 **Varzakas T, Labropoulos A, Anestis S.** 2012. *Sweeteners: Nutritional Aspects, Applications, and*

674 *Production Technology*. CRC Press, 59–60.

675 **Wakai A, McCabe A, Roberts I, Schierhout G.** 2013. Mannitol for acute traumatic brain injury.

676 *Cochrane Database Syst Rev* **5**, CD001049.

677 **Wei N, Quarterman J, Jin YS.** 2013. Marine macroalgae: an untapped resource for producing

678 *fuels and chemicals*. *Trends Biotechnol* **31**, 70–77.

679 **Wisselink HW, Moers AP, Mars AE, Hoefnagel MH, de Vos WM, Hugenholtz J.** 2005.

680 *Overproduction of heterologous mannitol 1-phosphatase: a key factor for engineering mannitol*

681 *production by Lactococcus lactis*. *Appl Environ Microbiol* **71**, 1507–1514.

682 **Xia A, Jacob A, Tabassum MR, Herrmann C, Murphy JD.** 2016. Production of hydrogen,

683 *ethanol and volatile fatty acids through co-fermentation of macro- and micro-algae*. *Bioresour*

684 *Technol* **205**, 118–125.

685 **Ye N, Zhang X, Miao M, Fan X, Zheng Y, Xu D, Wang J, Zhou L, Wang D, Gao Y, et al.** 2015.

686 *Saccharina* genomes provide novel insight into kelp biology. *Nat Commun* **24**, 6:6986.

**A**

**B**[illegible]

Figure 2

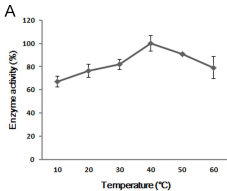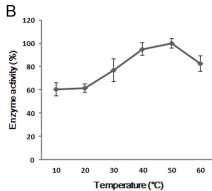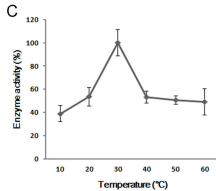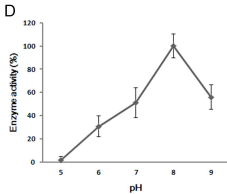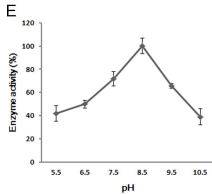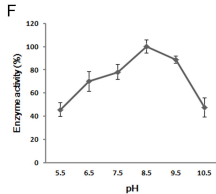

**Figure 3**

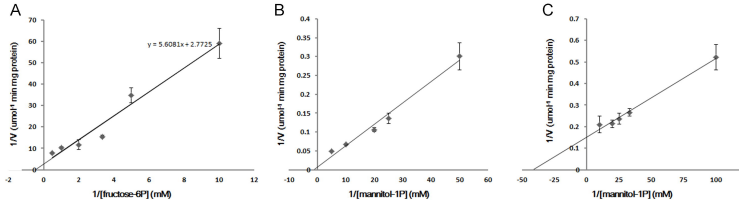

**Figure 4**

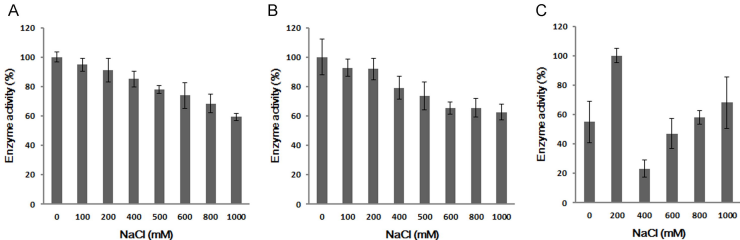

Figure 5

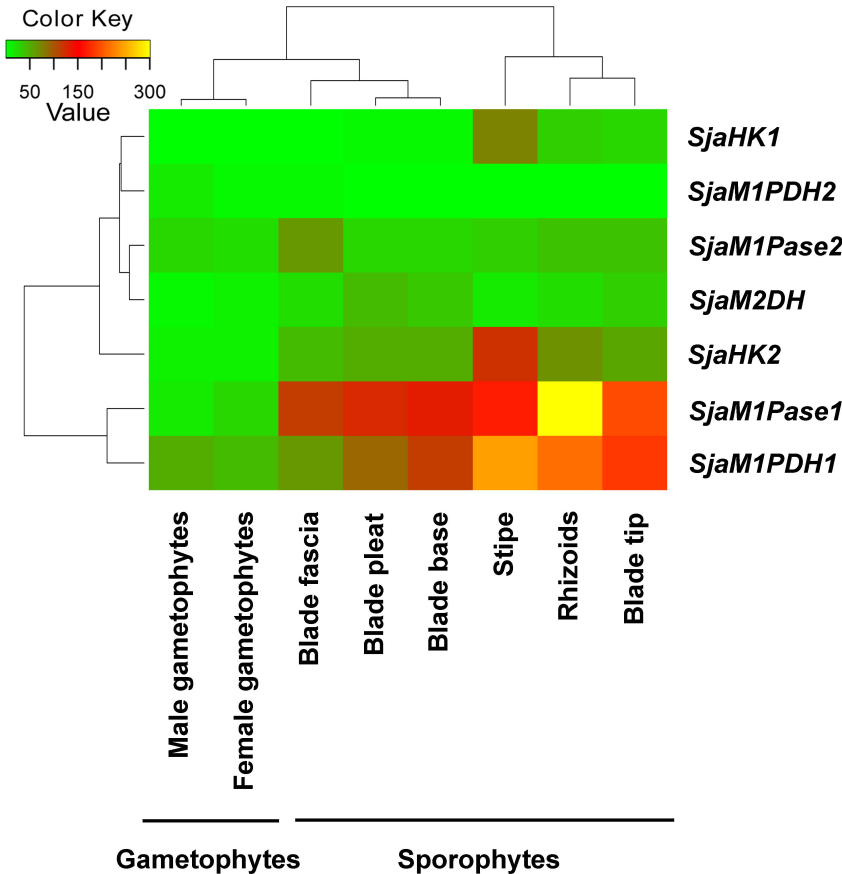

**Figure 6**

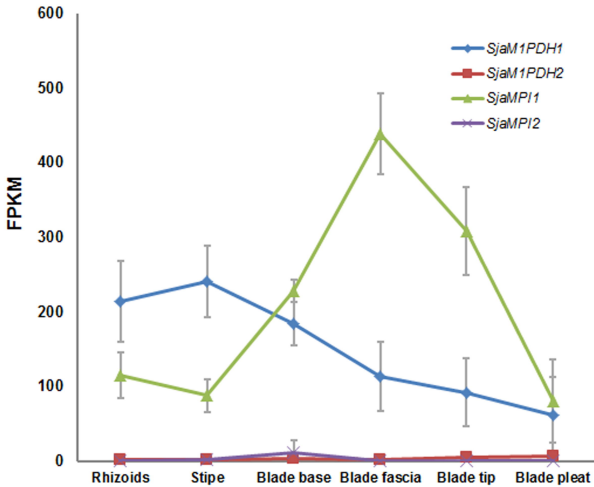



**Figure 7**

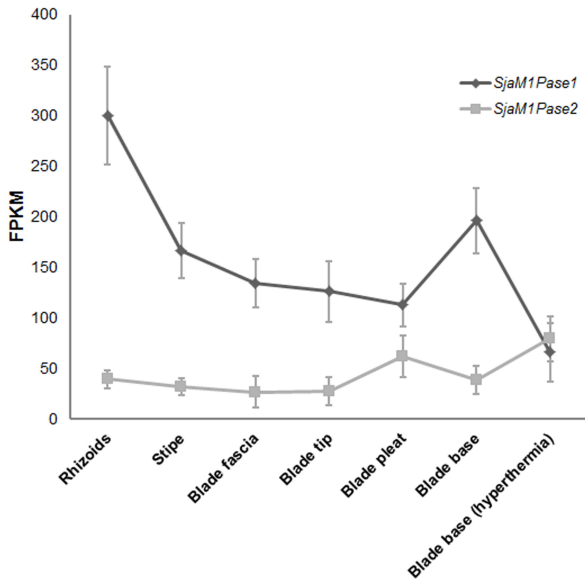

Figure 8

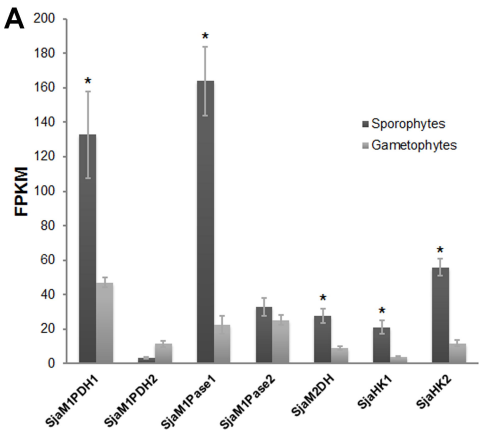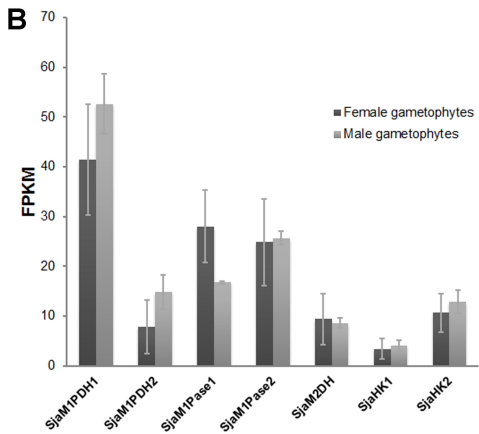

Source: https://www.biorxiv.org/content/10.1101/243402v1.full.pdf
